# Supplementary material for: Nanostructured silicon ferromagnet collected by a permanent neodymium magnet
Source: Royal Society of Chemistry journal article supplement (doi:10.1039/c7cc07372k), 2017-01-01
Supplement: c7cc07372k1.pdf [file c7cc07372k1.pdf]

## Electronic Supplementary Materials (ESI) for ChemComm.

### Nanostructured silicon ferromagnet collected by a permanent neodymium magnet

Nanostructured Si (N-Si) was prepared by anodic electroetching of a p-type silicon wafer, which was sliced along the (100) plane, in 24% HF-ethanol solution.<sup>1)</sup> The electroetching was carried out under a current density of  $100 \text{ mA cm}^{-2}$  for 2, 10, 20, or 30 min. The powdered Si was scratched from the wafer with a spatula after the electroetching process, then subsequently rinsed with distilled water and dried in a vacuum oven. The Si wafer, crystalline powder from the Si wafer (C-Si), and the obtained samples, which were labelled as P-Si  $x$  ( $x = 2, 10, 20$ , and  $30$ ), were used for characterisation by X-ray diffraction (XRD) (UltimaIV, Rigaku), field emission scanning electron microscopy (FE-SEM) (JSM-6330F, JEOL), transmission electron microscopy (TEM) (H-7650, Hitachi), electron spin resonance (ESR) spectroscopy (JES-TE200, JEOL), X-ray photoelectron spectroscopy (XPS) (JPS-9010MX, JEOL), Raman spectroscopy (NRS-3100, JASCO), and SQUID magnetometry (MPMSR2, Quantum Design). XPS spectra were deconvoluted into seven peaks: Si (0), standard; Si (1+)  $\text{Si}_2\text{O}$ ,  $-0.95 \text{ eV}$ ; Si (2+)  $\text{SiO}$ ,  $-1.75 \text{ eV}$ ; Si (3+)  $\text{Si}_2\text{O}_3$ ,  $-2.48 \text{ eV}$ ; Si (4+)  $\text{SiO}_2$ ,  $-3.90 \text{ eV}$ ; Si (4+) thick  $\text{SiO}_2$ ; Si (remaining atom).<sup>2, 3)</sup>

The magnetisation of P-Si  $x$  depended on the electroetching time (Fig. S1). The Si wafer exhibited a diamagnetic behaviour. Crystalline Si powder obtained from the Si wafer exhibited paramagnetism because of a small and positive magnetisation, which increases linearly with increasing magnetic field.

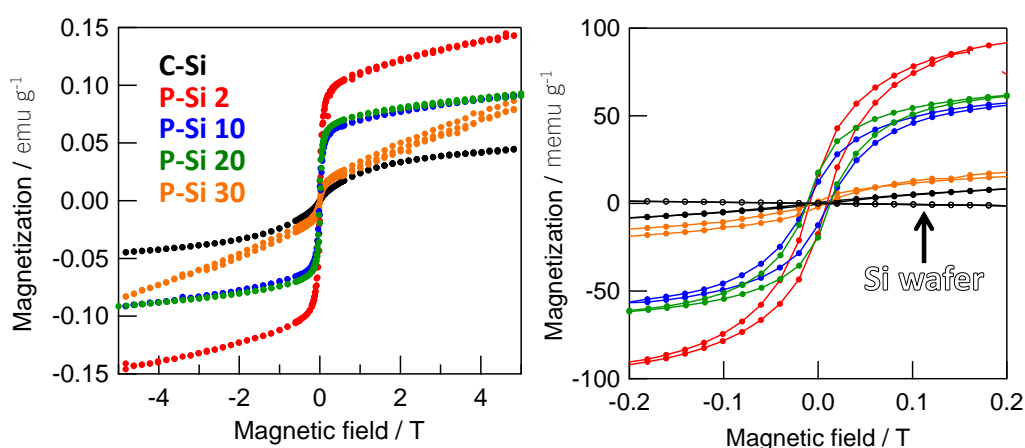

Fig. S1 Magnetisation curves of nanostructured silicon (P-Si  $x$ ) obtained by the electroetching for various times ( $x$  min), ○: Si wafer; ●: C-Si (crystalline Si powder from Si wafer) at 2 K.

In P-Si  $x$  samples, a greater saturation magnetisation and coercivity were obtained at shorter electroetching times. The magnet was found to be ferromagnetic because the magnetic hysteresis was observed for all P-Si  $x$  samples, although the hysteresis loops were very small.

The temperature-dependence curves of a magnetic susceptibility ( $\chi$ ) of the Si wafer, C-Si and P-Si  $x$  are shown in Fig S2. The Si wafer is diamagnetic, with a negative, small, and constant  $\chi$ . C-Si is also understood to be paramagnetic because of a positive and higher  $\chi$  at low temperatures. As shown in Fig. S1, P-Si 2 exhibits the highest  $\chi$  and is almost insensitive to temperature because it is ferromagnetic and its Curie temperature is greater than 150 K.

Fig. S3 shows the XRD patterns of the C-Si and P-Si  $x$  samples. The pattern of C-Si is a typical pattern of powdered Si. The patterns of P-Si 20 and 30 are similar to that of C-Si, although the peaks are broad because of the low crystallinity of the P-Si  $x$  samples. By contrast, the patterns of P-Si 2 and 10 differ slightly, showing a relatively strong peak assigned to the (400) plane. The intensity of this peak is attributed to the Si wafer being sliced along the (100) plane. The P-Si 2 and 10 samples had a residual structure oriented to the plane of the Si wafer because of the short electroetching time. The primary particle size was calculated from the patterns using the Scherrer equation: > 100 nm, 43 nm, 34 nm, 29 nm and 17 nm for C-Si, P-Si 2, P-Si 10, P-Si 20 and P-Si 30, respectively. Thus, the P-Si  $x$  samples are nanostructured solids.

The porosity of P-Si  $x$  samples was examined via  $N_2$  gas adsorption measurements at 77 K; the results are shown in Fig. S4. The C-Si is found to be

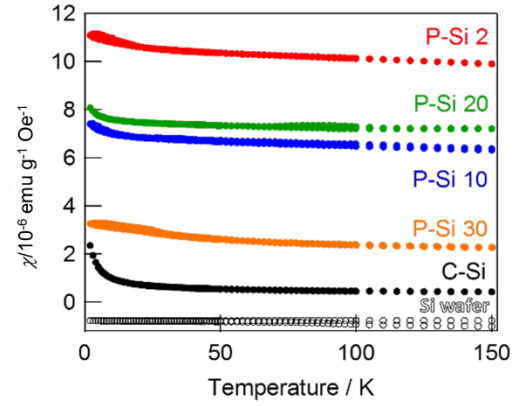

Fig. S2 Temperature dependence of magnetic susceptibility ( $\chi$ ) of nanostructured silicon (P-Si  $x$ ) obtained by the electroetching for various times ( $x$  min). Magnetic field: 1 T.

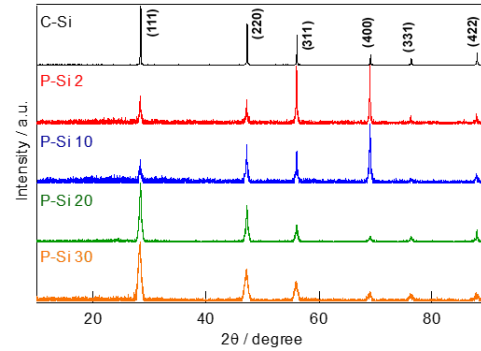

Fig. S3 XRD patterns of nanostructured silicon (P-Si  $x$ ). X ray target: Cu  $K\alpha$

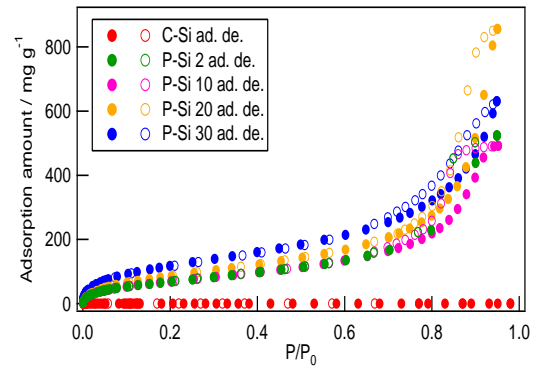

Fig. S4  $N_2$  adsorption isotherms of P-Si  $x$ . Closed: adsorption; open: desorption

nonporous, whereas P-Si  $x$  samples are mesoporous. The pore size distribution was obtained via Barrett–Joyner–Halenda (BJH) analysis of the isotherms (Fig. S5). All of the P-Si  $x$  samples have mesopores with pore diameters 10 nm or larger. The longer etching times caused a broad pore size distribution for pores larger than 15 nm. Thus, the electroetching produced nanopores on the Si crystal. The nanostructure should be intrinsic to the ferromagnetism of P-Si  $x$ .

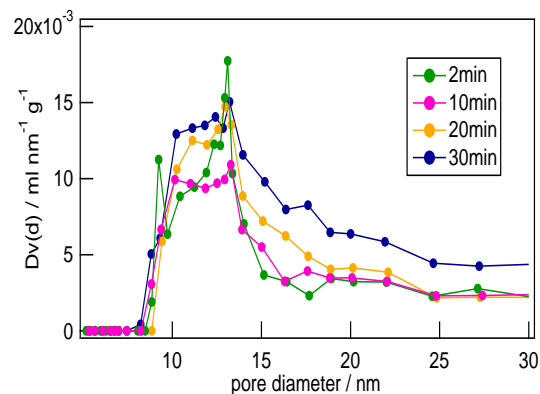

Fig. S5 Pore size distribution after the BJH analysis from the  $N_2$  adsorption isotherms of P-Si  $x$  (Fig. S4).

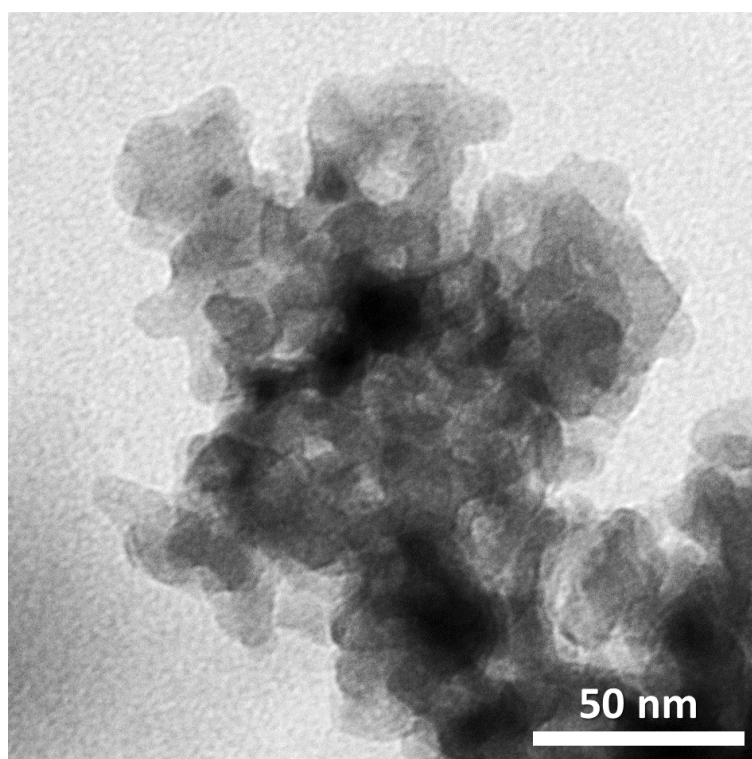

Fig. S6 TEM image of mN-Si.

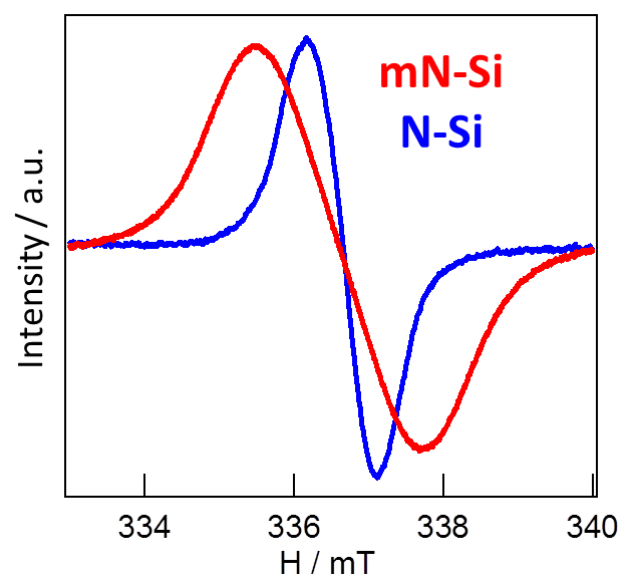

Fig. S7 Electron spin resonance (ESR) spectra of N-Si (blue) and mN-Si (red).

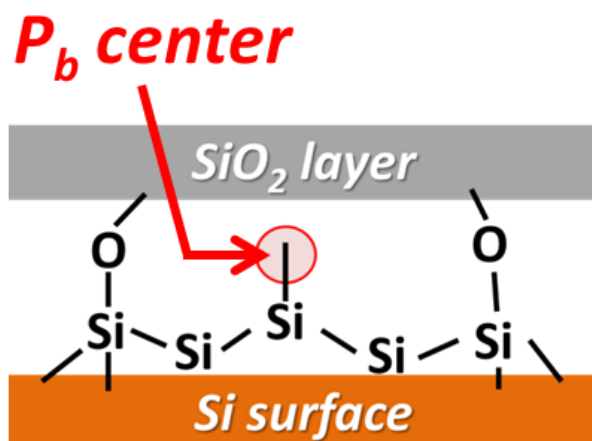

Fig. S8 Electron spin formed in a silicon nanostructure.<sup>4)</sup>

## Surface states and nanostructures

| Property (Apparatus)                           | mN-Si                        | N-Si             |
|------------------------------------------------|------------------------------|------------------|
| Magnetism (SQUID)                              | Superpara                    | Ferro            |
| Unpaired electron (ESR)                        | Si dangling bond (pb center) |                  |
| Crystallite size (Raman, XRD)                  | Smaller (21.2 nm)            | Larger (39.2 nm) |
| [SiO <sub>x</sub> /Si2p] Peak area ratio (XPS) | 36.6%                        | 22.6%            |
| [O1s/Si2p] Peak area ratio (XPS)               | 50.9%                        | 23.6%            |

  

|               |                                                                                                                                             |                                                                                                                                                           |
|---------------|---------------------------------------------------------------------------------------------------------------------------------------------|-----------------------------------------------------------------------------------------------------------------------------------------------------------|
| Surface state | <p><b>Dangling bonds are separated by oxygen atom</b></p> 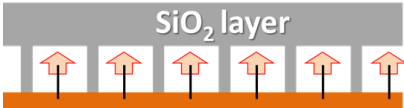 | <p><b>The size of magnetic domain is larger than that of mN-Si</b></p> 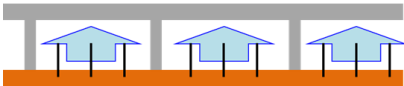 |
|               | <p><b>Crystal structure</b></p> 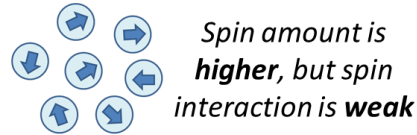                          | <p><b>Crystal structure</b></p> 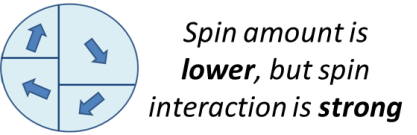                                       |

Fig. S9 Surface states and nanostructures of N-Si and mN-Si.

## References

- 1) V. Lehmann and H. Föll, *J. Electrochem. Soc.*, **1990**, 137, 653–659.
- 2) F. J. Himpsel, F. R. McFeely, A. Taleb-Ibrahimi and J. A. Yarmoff, *Phys. Rev. B*, **1988**, 38, 6084–6096.
- 3) Th. Eickhoff, V. Medicherla and W. Drube, *J. Electron Spectrosc. Relat. Phenom.*, **2004**, 137–140, 85–88.
- 4) Y. Uchida, N. Koshida, H. Koyama and Y. Yamamoto, *Appl. Phys. Lett.*, **1993**, 63, 961–963.
